# Supplementary material
Source: Springer Nature journal article supplement (https://www.springermedizin.de/resource/supplementary/12957_2012_1277_MOESM11_ESM.pdf/9562914)

FIGURE 2H

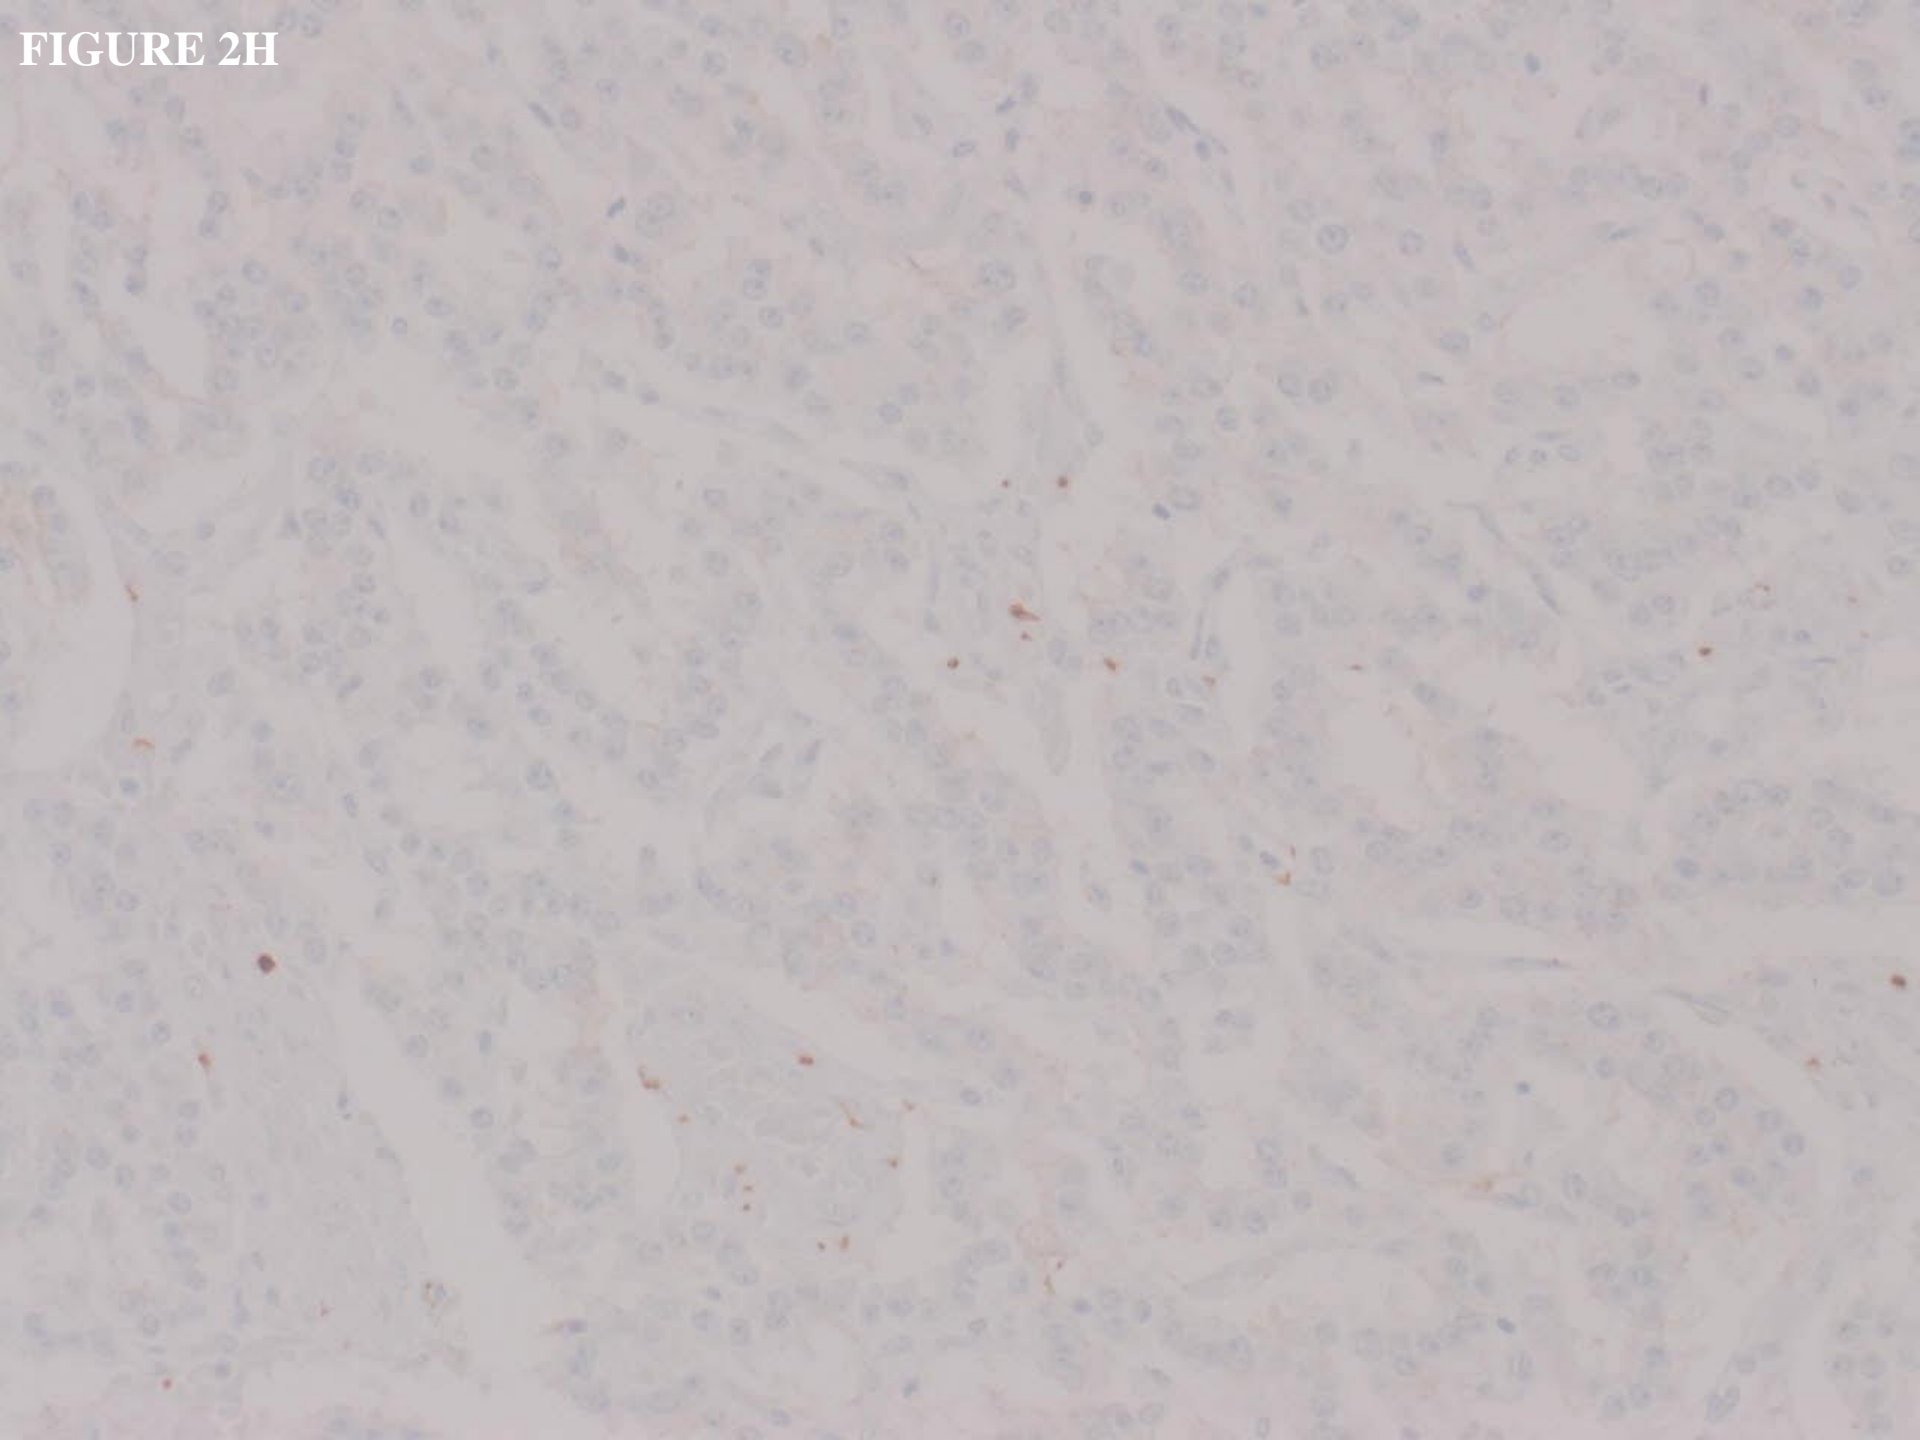

Supplement: MOESM11 [file 9562914]
